# Supplementary material for: Symptomatic Versus Inapparent Outcome in Repeat Dengue Virus Infections Is Influenced by the Time Interval between Infections and Study Year
Source: PubMed Central journal article supplement (PMC3738476; doi:10.1371/journal.pntd.0002357), 2013-08-08
Supplement: pntd.0002357.s001.pdf [file pntd.0002357.s001.pdf]

STROBE Statement—Checklist of items that should be included in reports of *cohort studies*

|                              | Item No | Recommendation                                                                                                                                                                                                                                                                                                                                                                                                                                                                                                                                                                                                          |
|------------------------------|---------|-------------------------------------------------------------------------------------------------------------------------------------------------------------------------------------------------------------------------------------------------------------------------------------------------------------------------------------------------------------------------------------------------------------------------------------------------------------------------------------------------------------------------------------------------------------------------------------------------------------------------|
| <b>Title and abstract</b>    | 1       | (a) Indicate the study's design with a commonly used term in the title or the abstract <b>X</b><br>(b) Provide in the abstract an informative and balanced summary of what was done and what was found <b>X</b>                                                                                                                                                                                                                                                                                                                                                                                                         |
| <b>Introduction</b>          |         |                                                                                                                                                                                                                                                                                                                                                                                                                                                                                                                                                                                                                         |
| Background/rationale         | 2       | Explain the scientific background and rationale for the investigation being reported <b>X</b>                                                                                                                                                                                                                                                                                                                                                                                                                                                                                                                           |
| Objectives                   | 3       | State specific objectives, including any prespecified hypotheses <b>X</b>                                                                                                                                                                                                                                                                                                                                                                                                                                                                                                                                               |
| <b>Methods</b>               |         |                                                                                                                                                                                                                                                                                                                                                                                                                                                                                                                                                                                                                         |
| Study design                 | 4       | Present key elements of study design early in the paper <b>X (Methods: Study site and population)</b>                                                                                                                                                                                                                                                                                                                                                                                                                                                                                                                   |
| Setting                      | 5       | Describe the setting, locations, and relevant dates, including periods of recruitment, exposure, follow-up, and data collection <b>X (Methods: Study site and population)</b>                                                                                                                                                                                                                                                                                                                                                                                                                                           |
| Participants                 | 6       | (a) Give the eligibility criteria, and the sources and methods of selection of participants. Describe methods of follow-up <b>X (Methods: Study site and population)</b><br>(b) For matched studies, give matching criteria and number of exposed and unexposed <b>N/A</b>                                                                                                                                                                                                                                                                                                                                              |
| Variables                    | 7       | Clearly define all outcomes, exposures, predictors, potential confounders, and effect modifiers. Give diagnostic criteria, if applicable <b>X (Methods: DENV infections; Longitudinal analysis of neutralization titers)</b>                                                                                                                                                                                                                                                                                                                                                                                            |
| Data sources/<br>measurement | 8*      | For each variable of interest, give sources of data and details of methods of assessment (measurement). Describe comparability of assessment methods if there is more than one group <b>X (Methods: DENV infections; Reporter Viral Particle-based neutralization assay)</b>                                                                                                                                                                                                                                                                                                                                            |
| Bias                         | 9       | Describe any efforts to address potential sources of bias <b>X (Methods: DENV infections; Supplementary Table S1; Results: Identification of DENV infections; Supplementary Figure S1)</b>                                                                                                                                                                                                                                                                                                                                                                                                                              |
| Study size                   | 10      | Explain how the study size was arrived at <b>X (Methods: Study site and population)</b>                                                                                                                                                                                                                                                                                                                                                                                                                                                                                                                                 |
| Quantitative variables       | 11      | Explain how quantitative variables were handled in the analyses. If applicable, describe which groupings were chosen and why <b>X (Methods: DENV infections, Statistical analysis; Results: Interval between DENV infections according to inapparent or symptomatic outcome)</b>                                                                                                                                                                                                                                                                                                                                        |
| Statistical methods          | 12      | (a) Describe all statistical methods, including those used to control for confounding <b>X (Methods: Neutralization assay quality control, Statistical analysis)</b><br>(b) Describe any methods used to examine subgroups and interactions <b>X (Methods: Statistical analysis)</b><br>(c) Explain how missing data were addressed <b>X (Results: Identification of DENV infections; Supplementary Figure S1)</b><br>(d) If applicable, explain how loss to follow-up was addressed <b>X (Results: Identification of DENV infections; Supplementary Figure S1)</b><br>(e) Describe any sensitivity analyses <b>N/A</b> |
| <b>Results</b>               |         |                                                                                                                                                                                                                                                                                                                                                                                                                                                                                                                                                                                                                         |
| Participants                 | 13*     | (a) Report numbers of individuals at each stage of study—eg numbers potentially eligible, examined for eligibility, confirmed eligible, included in the study, completing follow-up, and analysed                                                                                                                                                                                                                                                                                                                                                                                                                       |

**X (Methods: Study site and population, DENV infections; Supplementary Table S1; Results: Identification of DENV infections; Supplementary Figure S1)**

|                          |     |                                                                                                                                                                                                                                                                                                                                                                                                                                                                 |
|--------------------------|-----|-----------------------------------------------------------------------------------------------------------------------------------------------------------------------------------------------------------------------------------------------------------------------------------------------------------------------------------------------------------------------------------------------------------------------------------------------------------------|
|                          |     | (b) Give reasons for non-participation at each stage <b>N/A</b>                                                                                                                                                                                                                                                                                                                                                                                                 |
|                          |     | (c) Consider use of a flow diagram                                                                                                                                                                                                                                                                                                                                                                                                                              |
| Descriptive data         | 14* | (a) Give characteristics of study participants (eg demographic, clinical, social) and information on exposures and potential confounders <b>X (Methods: Study site and population; Results: Identification of DENV infections; Table 1)</b>                                                                                                                                                                                                                     |
|                          |     | (b) Indicate number of participants with missing data for each variable of interest <b>X (Results: Identification of DENV infections; Supplementary Figure S1)</b>                                                                                                                                                                                                                                                                                              |
|                          |     | (c) Summarise follow-up time (eg, average and total amount) <b>X (Methods: Study site and population; Supplementary Table S1)</b>                                                                                                                                                                                                                                                                                                                               |
| Outcome data             | 15* | Report numbers of outcome events or summary measures over time <b>X (Results: Identification of DENV infections, Effect of infection number and study year on inapparent versus symptomatic DENV infection outcome; Figure 1)</b>                                                                                                                                                                                                                               |
| Main results             | 16  | (a) Give unadjusted estimates and, if applicable, confounder-adjusted estimates and their precision (eg, 95% confidence interval). Make clear which confounders were adjusted for and why they were included <b>X (Results: Interval between DENV infections according to inapparent or symptomatic outcome, Interval between DENV infections according to inapparent or symptomatic outcome as determined by neutralizing antibody titer; Figures 2 and 4)</b> |
|                          |     | (b) Report category boundaries when continuous variables were categorized <b>X (Results: Interval between DENV infections according to inapparent or symptomatic outcome)</b>                                                                                                                                                                                                                                                                                   |
|                          |     | (c) If relevant, consider translating estimates of relative risk into absolute risk for a meaningful time period <b>N/A</b>                                                                                                                                                                                                                                                                                                                                     |
| Other analyses           | 17  | Report other analyses done—eg analyses of subgroups and interactions, and sensitivity analyses <b>N/A</b>                                                                                                                                                                                                                                                                                                                                                       |
| <b>Discussion</b>        |     |                                                                                                                                                                                                                                                                                                                                                                                                                                                                 |
| Key results              | 18  | Summarise key results with reference to study objectives <b>X</b>                                                                                                                                                                                                                                                                                                                                                                                               |
| Limitations              | 19  | Discuss limitations of the study, taking into account sources of potential bias or imprecision. Discuss both direction and magnitude of any potential bias <b>X</b>                                                                                                                                                                                                                                                                                             |
| Interpretation           | 20  | Give a cautious overall interpretation of results considering objectives, limitations, multiplicity of analyses, results from similar studies, and other relevant evidence <b>X</b>                                                                                                                                                                                                                                                                             |
| Generalisability         | 21  | Discuss the generalisability (external validity) of the study results <b>X</b>                                                                                                                                                                                                                                                                                                                                                                                  |
| <b>Other information</b> |     |                                                                                                                                                                                                                                                                                                                                                                                                                                                                 |
| Funding                  | 22  | Give the source of funding and the role of the funders for the present study and, if applicable, for the original study on which the present article is based <b>X (Funding)</b>                                                                                                                                                                                                                                                                                |

\*Give information separately for exposed and unexposed groups.

**Note:** An Explanation and Elaboration article discusses each checklist item and gives methodological background and published examples of transparent reporting. The STROBE checklist is best used in conjunction with this article (freely available on the Web sites of PLoS Medicine at <http://www.plosmedicine.org/>, Annals of Internal Medicine at <http://www.annals.org/>, and Epidemiology at <http://www.epidem.com/>). Information on the STROBE Initiative is available at <http://www.strobe-statement.org>.
