# Supplementary material for: Symptomatic Versus Inapparent Outcome in Repeat Dengue Virus Infections Is Influenced by the Time Interval between Infections and Study Year
Source: PubMed Central journal article supplement (PMC3738476; doi:10.1371/journal.pntd.0002357), 2013-08-08
Supplement: pntd.0002357.s003.pdf [file pntd.0002357.s003.pdf]

**Participant A**

| NT <sub>50</sub> | Pre-infection | Post-infection | Fold change |
|------------------|---------------|----------------|-------------|
| DENV-1           | 46            | 343            | 7.5         |
| DENV-2           | 471           | 2529           | 5.4         |
| DENV-3           | 13            | 3442           | 264.8       |
| DENV-4           | 29            | 1035           | 35.7        |

RT-PCR/virus isolation

DENV-3

**Participant K**

| NT <sub>50</sub> | Pre-infection | Post-infection | Fold change |
|------------------|---------------|----------------|-------------|
| DENV-1           | 52            | 194            | 3.7         |
| DENV-2           | 314           | 353            | 1.1         |
| DENV-3           | 42            | 373            | 8.9         |
| DENV-4           | 31            | 105            | 3.4         |

RT-PCR/virus isolation

DENV-3

**Participant C**

| NT <sub>50</sub> | Pre-infection | Post-infection | Fold change |
|------------------|---------------|----------------|-------------|
| DENV-1           | <10           | 24             | 4.8         |
| DENV-2           | <10           | 95             | 19.0        |
| DENV-3           | <10           | 11             | 2.2         |
| DENV-4           | <10           | 14             | 2.8         |

RT-PCR/virus isolation

DENV-2

**Participant L**

| NT <sub>50</sub> | Pre-infection | Post-infection | Fold change |
|------------------|---------------|----------------|-------------|
| DENV-1           | 2525          | 6333           | 2.5         |
| DENV-2           | <10           | 622            | 124.4       |
| DENV-3           | 98            | 1868           | 19.1        |
| DENV-4           | <10           | 353            | 70.6        |

RT-PCR/virus isolation

DENV-2

**Participant D**

| NT <sub>50</sub> | Pre-infection | Post-infection | Fold change |
|------------------|---------------|----------------|-------------|
| DENV-1           | 113           | 5874           | 52.0        |
| DENV-2           | 27            | 238            | 8.8         |
| DENV-3           | <10           | 1382           | 276.4       |
| DENV-4           | 27            | 459            | 17.0        |

RT-PCR/virus isolation

DENV-3

**Participant M**

| NT <sub>50</sub> | Pre-infection | Post-infection | Fold change |
|------------------|---------------|----------------|-------------|
| DENV-1           | 29            | 220            | 7.6         |
| DENV-2           | 29            | 421            | 14.5        |
| DENV-3           | 29            | 281            | 9.7         |
| DENV-4           | 40            | 20             | 0.5         |

RT-PCR/virus isolation

DENV-3

**Participant E**

| NT <sub>50</sub> | Pre-infection | Post-infection | Fold change |
|------------------|---------------|----------------|-------------|
| DENV-1           | <10           | 20             | 4.0         |
| DENV-2           | <10           | 54             | 10.8        |
| DENV-3           | 24            | 1012           | 42.2        |
| DENV-4           | <10           | 191            | 38.2        |

RT-PCR/virus isolation

DENV-3

**Participant N**

| NT <sub>50</sub> | Pre-infection | Post-infection | Fold change |
|------------------|---------------|----------------|-------------|
| DENV-1           | 57            | 150            | 2.6         |
| DENV-2           | 262           | 176            | 0.7         |
| DENV-3           | 73            | 289            | 4.0         |
| DENV-4           | 31            | 63             | 2.0         |

RT-PCR/virus isolation

DENV-3

**Participant F**

| NT <sub>50</sub> | Pre-infection | Post-infection | Fold change |
|------------------|---------------|----------------|-------------|
| DENV-1           | 797           | 4154           | 5.2         |
| DENV-2           | <10           | 1597           | 319.4       |
| DENV-3           | 2986          | 8005           | 2.7         |
| DENV-4           | 250           | 2183           | 8.7         |

RT-PCR/virus isolation

DENV-2

**Participant O**

| NT <sub>50</sub> | Pre-infection | Post-infection | Fold change |
|------------------|---------------|----------------|-------------|
| DENV-1           | 324           | 8830           | 27.3        |
| DENV-2           | 62            | 3264           | 52.6        |
| DENV-3           | 54            | 19499          | 361.1       |
| DENV-4           | 181           | 3840           | 21.2        |

RT-PCR/virus isolation

DENV-3

**Participant G**

| NT <sub>50</sub> | Pre-infection | Post-infection | Fold change |
|------------------|---------------|----------------|-------------|
| DENV-1           | 47            | 373            | 7.9         |
| DENV-2           | 243           | 475            | 2.0         |
| DENV-3           | 36            | 849            | 23.6        |
| DENV-4           | 31            | 551            | 17.8        |

RT-PCR/virus isolation

DENV-3

**Participant P**

| NT <sub>50</sub> | Pre-infection | Post-infection | Fold change |
|------------------|---------------|----------------|-------------|
| DENV-1           | 18            | 91             | 5.1         |
| DENV-2           | 144           | 210            | 1.5         |
| DENV-3           | 23            | 168            | 7.3         |
| DENV-4           | 84            | 221            | 2.6         |

RT-PCR/virus isolation

DENV-3

**Participant H**

| NT <sub>50</sub> | Pre-infection | Post-infection | Fold change |
|------------------|---------------|----------------|-------------|
| DENV-1           | 49            | 105            | 2.1         |
| DENV-2           | 1062          | 2143           | 2.0         |
| DENV-3           | 29            | 2456           | 84.7        |
| DENV-4           | 88            | 467            | 5.3         |

RT-PCR/virus isolation

DENV-3

**Participant Q**

| NT <sub>50</sub> | Pre-infection | Post-infection | Fold change |
|------------------|---------------|----------------|-------------|
| DENV-1           | <10           | 29             | 5.8         |
| DENV-2           | <10           | 552            | 110.4       |
| DENV-3           | <10           | 12             | 2.4         |
| DENV-4           | <10           | 20             | 4.0         |

RT-PCR/virus isolation

DENV-2

**Participant I**

| NT <sub>50</sub> | Pre-infection | Post-infection | Fold change |
|------------------|---------------|----------------|-------------|
| DENV-1           | 6192          | 9203           | 1.5         |
| DENV-2           | <10           | 270            | 54.0        |
| DENV-3           | 41            | 3922           | 95.7        |
| DENV-4           | <10           | 129            | 25.8        |

RT-PCR/virus isolation

DENV-3

**Participant R**

| NT <sub>50</sub> | Pre-infection | Post-infection | Fold change |
|------------------|---------------|----------------|-------------|
| DENV-1           | 29            | 83             | 2.9         |
| DENV-2           | 34            | 428            | 12.6        |
| DENV-3           | 25            | 35             | 1.4         |
| DENV-4           | <10           | 31             | 6.2         |

RT-PCR/virus isolation

DENV-2

**Participant J**

| NT <sub>50</sub> | Pre-infection | Post-infection | Fold change |
|------------------|---------------|----------------|-------------|
| DENV-1           | 47            | 318            | 6.8         |
| DENV-2           | 469           | 2131           | 4.5         |
| DENV-3           | <10           | 1258           | 251.6       |
| DENV-4           | <10           | 552            | 110.4       |

RT-PCR/virus isolation

DENV-3

**Participant S**

| NT <sub>50</sub> | Pre-infection | Post-infection | Fold change |
|------------------|---------------|----------------|-------------|
| DENV-1           | <10           | 18             | 3.6         |
| DENV-2           | <10           | 982            | 196.4       |
| DENV-3           | <10           | 63             | 12.6        |
| DENV-4           | 97            | 448            | 4.6         |

RT-PCR/virus isolation

DENV-2

**Participant T**

| NT <sub>50</sub> | Pre-infection | Post-infection | Fold change |
|------------------|---------------|----------------|-------------|
| DENV-1           | 22            | 390            | 17.7        |
| DENV-2           | 102           | 28             | 0.3         |
| DENV-3           | 24            | 31             | 1.3         |
| DENV-4           | 45            | 61             | 1.4         |

RT-PCR/virus isolation

DENV-1

**Participant Y**

| NT <sub>50</sub> | Pre-infection | Post-infection | Fold change |
|------------------|---------------|----------------|-------------|
| DENV-1           | <10           | <10            | 1.0         |
| DENV-2           | <10           | 2997           | 599.4       |
| DENV-3           | <10           | 44             | 8.8         |
| DENV-4           | <10           | <10            | 1.0         |

RT-PCR/virus isolation

DENV-2

**Participant U**

| NT <sub>50</sub> | Pre-infection | Post-infection | Fold change |
|------------------|---------------|----------------|-------------|
| DENV-1           | 45            | 61             | 1.4         |
| DENV-2           | 20            | 55             | 2.8         |
| DENV-3           | 17            | 493            | 29.0        |
| DENV-4           | 23            | 35             | 1.5         |

RT-PCR/virus isolation

DENV-3

**Participant Z**

| NT <sub>50</sub> | Pre-infection | Post-infection | Fold change |
|------------------|---------------|----------------|-------------|
| DENV-1           | <10           | <10            | 1.0         |
| DENV-2           | 102           | 191            | 1.9         |
| DENV-3           | <10           | 364            | 72.8        |
| DENV-4           | 13            | 36             | 2.8         |

RT-PCR/virus isolation

DENV-3

**Participant V**

| NT <sub>50</sub> | Pre-infection | Post-infection | Fold change |
|------------------|---------------|----------------|-------------|
| DENV-1           | 21            | 195            | 9.3         |
| DENV-2           | 103           | 256            | 2.5         |
| DENV-3           | 26            | 113            | 4.3         |
| DENV-4           | 14            | 37             | 2.6         |

RT-PCR/virus isolation

DENV-1

**Participant AA**

| NT <sub>50</sub> | Pre-infection | Post-infection | Fold change |
|------------------|---------------|----------------|-------------|
| DENV-1           | <10           | 33             | 6.6         |
| DENV-2           | 47            | 745            | 15.9        |
| DENV-3           | <10           | 478            | 95.6        |
| DENV-4           | <10           | 58             | 11.6        |

RT-PCR/virus isolation

DENV-3

**Participant W**

| NT <sub>50</sub> | Pre-infection | Post-infection | Fold change |
|------------------|---------------|----------------|-------------|
| DENV-1           | <10           | 33             | 6.6         |
| DENV-2           | <10           | 39             | 7.8         |
| DENV-3           | <10           | 225            | 45.0        |
| DENV-4           | <10           | 18             | 3.6         |

RT-PCR/virus isolation

DENV-3

**Participant BB**

| NT <sub>50</sub> | Pre-infection | Post-infection | Fold change |
|------------------|---------------|----------------|-------------|
| DENV-1           | <10           | <10            | 1.0         |
| DENV-2           | 149           | 192            | 1.3         |
| DENV-3           | <10           | 54             | 10.8        |
| DENV-4           | <10           | 21             | 4.2         |

RT-PCR/virus isolation

DENV-3

**Participant X**

| NT <sub>50</sub> | Pre-infection | Post-infection | Fold change |
|------------------|---------------|----------------|-------------|
| DENV-1           | <10           | <10            | 1.0         |
| DENV-2           | <10           | 429            | 85.8        |
| DENV-3           | <10           | <10            | 1.0         |
| DENV-4           | <10           | <10            | 1.0         |

RT-PCR/virus isolation

DENV-2

**Supplementary Figure S2. Pre- and post-symptomatic DENV infection neutralizing titers as measured in annual samples.** For each symptomatic infection, the infecting serotype was predicted using the highest NT<sub>50</sub> fold-change (in green). The serotype identified in acute samples using RT-PCR and/or virus isolation is indicated. Note that the longitudinal analysis of participant M immune history showed an inapparent DENV-2 infection prior to the symptomatic DENV-3.
