# Supplementary material for: Symptomatic Versus Inapparent Outcome in Repeat Dengue Virus Infections Is Influenced by the Time Interval between Infections and Study Year
Source: PubMed Central journal article supplement (PMC3738476; doi:10.1371/journal.pntd.0002357), 2013-08-08
Supplement: pntd.0002357.s005.pdf [file pntd.0002357.s005.pdf]

**Supplementary Table 1. Results of Participation Survey by Year in the Pediatric Dengue Cohort Study, Managua, Nicaragua, 2004–2011**

|                                                         | 2004-05 <sup>a</sup> |      | 2005-06 <sup>a</sup> |      | 2006-07 <sup>a</sup> |      | 2007-08 <sup>a</sup> |      | 2008-09     |      | 2009-10     |      | 2010-11     |      |
|---------------------------------------------------------|----------------------|------|----------------------|------|----------------------|------|----------------------|------|-------------|------|-------------|------|-------------|------|
|                                                         | (N = 3,721)          |      | (N = 3,695)          |      | (N = 3,795)          |      | (N = 3,693)          |      | (N = 3,953) |      | (N = 3,969) |      | (N = 3,866) |      |
|                                                         | No.                  | %    | No.                  | %    | No.                  | %    | No.                  | %    | No.         | %    | No.         | %    | No.         | %    |
| Participated in survey                                  | 2,937                | 78.9 | 3,121                | 84.5 | 3,196                | 84.2 | 3,351                | 90.7 | 3,577       | 90.5 | 3,652       | 92.0 | 3,424       | 88.6 |
| Had a fever and consulted<br>other health-care provider | 72                   | 2.5  | 62                   | 2.0  | 72                   | 2.3  | 56                   | 1.7  | 43          | 1.2  | 67          | 1.8  | 60          | 1.8  |
| Had a fever and did not<br>consult a medical provider   | 49                   | 1.7  | 78                   | 2.5  | 195                  | 6.1  | 28                   | 0.8  | 32          | 0.9  | 86          | 2.4  | 58          | 1.7  |

<sup>a</sup> Ref. 25
