# Supplementary material for: Symptomatic Versus Inapparent Outcome in Repeat Dengue Virus Infections Is Influenced by the Time Interval between Infections and Study Year
Source: PubMed Central journal article supplement (PMC3738476; doi:10.1371/journal.pntd.0002357), 2013-08-08
Supplement: pntd.0002357.s006.pdf [file pntd.0002357.s006.pdf]

**Supplementary Table S2. Number of DENV infections in a subset of 39 participants of the cohort study as determined by neutralizing antibody titer.**

|                 | All<br>infections | First<br>infection | Second<br>infection | Third<br>infection |
|-----------------|-------------------|--------------------|---------------------|--------------------|
| DENV infections | 90                | 36                 | 36                  | 18                 |
| Inapparent      | 75                | 35                 | 27                  | 13                 |
| Symptomatic     | 15                | 1                  | 9                   | 5                  |
